# Supplementary material for: Comparison of Storage-Related Volatile Profiles and Sensory Properties of Cookies Containing Xylitol or Sucrose
Source: MDPI journal article supplement (doi:10.3390/foods12234270), 2023-11-26
Supplement: s1 [file s1]

# Supplementary

Article

## Comparison of storage-related volatile profiles and sensory properties of cookies containing xylitol or sucrose

Jaroslawa Rutkowska \*, Damian Baranowski, Agata Antoniewska-Krzeska and Eliza Kostyra

Institute of Human Nutrition Sciences, Faculty of Human Nutrition, Warsaw University of Life Sciences, Nowoursynowska St. 159c, 02-776 Warsaw, Poland;  
damian\_baranowski@sggw.edu.pl (D.B.); agata\_antoniewska@sggw.edu.pl (A.A.-K.);  
eliza\_kostyra@sggw.edu.pl (E.K.)

\* Correspondence: Correspondence: jaroslawa\_rutkowska@sggw.edu.pl

**Table S1:** Sensory attributes and definitions created by the panel members for Quantitative Descriptive Analysis

| Attribute                                                      | Definition                                                                    |
|----------------------------------------------------------------|-------------------------------------------------------------------------------|
| <b>Appearance</b>                                              |                                                                               |
| Color (light yellow color - brown color)                       | Brown color intensity on the cookie surface, between light-yellow and brown.  |
| <b>Aroma</b>                                                   |                                                                               |
| Buttery (not detected - extremely intense)                     | Fresh butter aroma.                                                           |
| Sweet/Caramelized (not detected - extremely intense)           | Sweet, aromatic sensation typical of the burnt sugar.                         |
| Fruity (not detected - extremely intense)                      | Sweet aroma which evokes impression of fruit.                                 |
| Nutty (not detected - extremely intense)                       | Specific odor of walnuts and hazelnuts.                                       |
| Roasty (not detected - extremely intense)                      | Aroma associated with freshly baked shortbread cookies or bread.              |
| Rancid (not detected - extremely intense)                      | Aroma associated with stored vegetable oil.                                   |
| Sour (not detected - extremely intense)                        | Vinegar aroma.                                                                |
| Pungent (not detected - extremely intense)                     | Strong odor which causes unpleasant, sharp or irritating sensation.           |
| <b>Taste</b>                                                   |                                                                               |
| Buttery (not detected - extremely intense)                     | Fresh butter taste.                                                           |
| Sweet (not detected - extremely intense)                       | Typical taste of sucrose.                                                     |
| Roasty (not detected - extremely intense)                      | Taste associated with freshly baked shortbread cookies or bread.              |
| Bitter (not detected - extremely intense)                      | Typical taste of caffeine or quinine.                                         |
| Aftertaste - cooling effect (not detected - extremely intense) | Cooling in-mouth sensation related with dissolving sweetener in saliva.       |
| <b>Texture</b>                                                 |                                                                               |
| Hardness (soft - hard)                                         | Minimum force necessary to bite the sample.                                   |
| Fracturability (very weak - strong)                            | Ease of breaking off a piece of cookie with teeth.                            |
| Moisture (very dry - very moist)                               | Perceived amount of water in the cookie.                                      |
| Adhesiveness (very weak - strong)                              | Necessary force to completely remove the sample from the palate using tongue. |
